# Supplementary material for: The seasonality of diarrheal pathogens: A retrospective study of seven sites over three years
Source: PubMed Central journal article supplement (PMC6711541; doi:10.1371/journal.pntd.0007211), 2019-08-15

# The Gambia

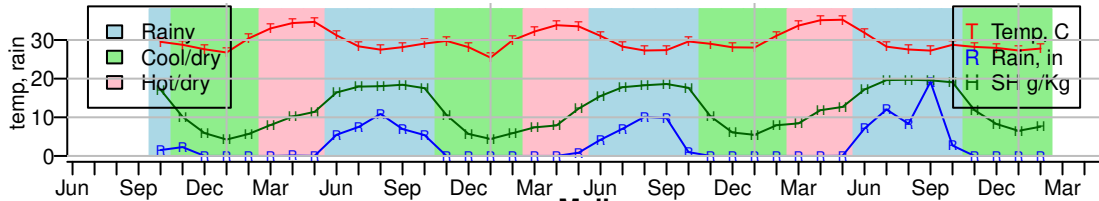

# Mali

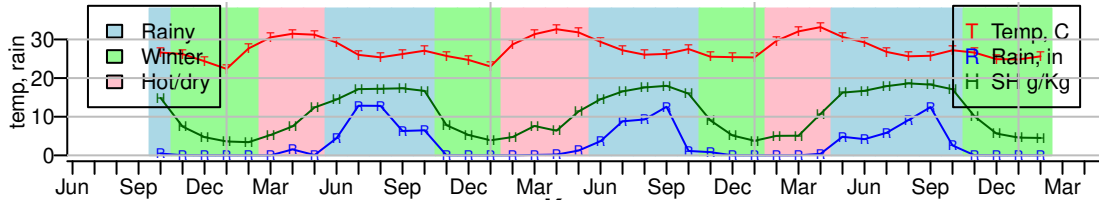

# Kenya

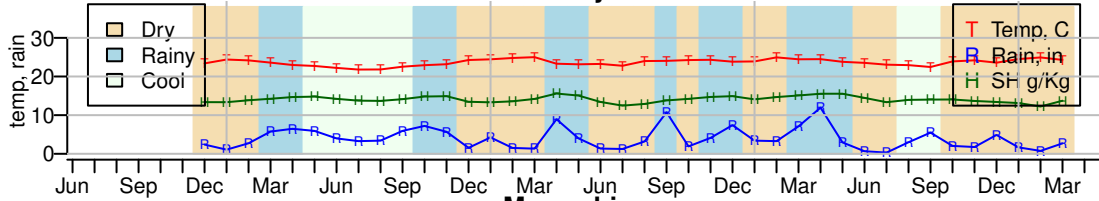

# Mozambique

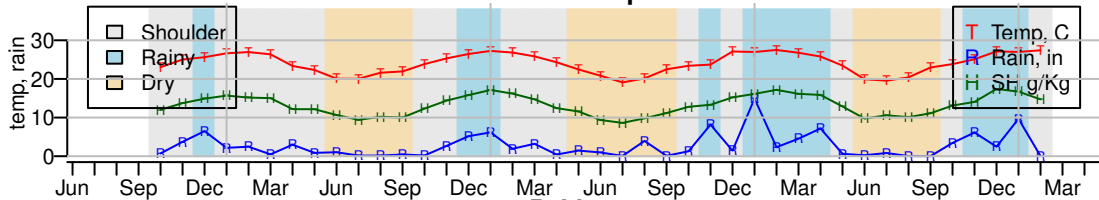

# Pakistan

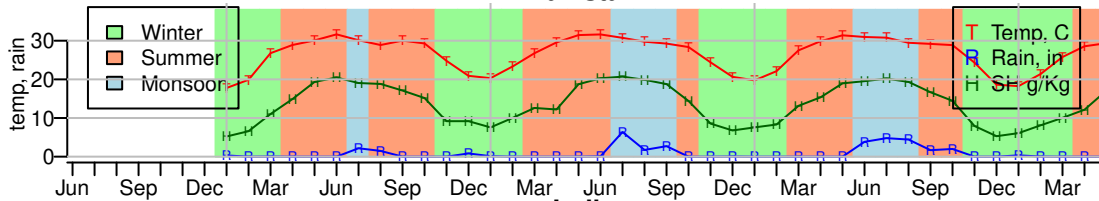

# India

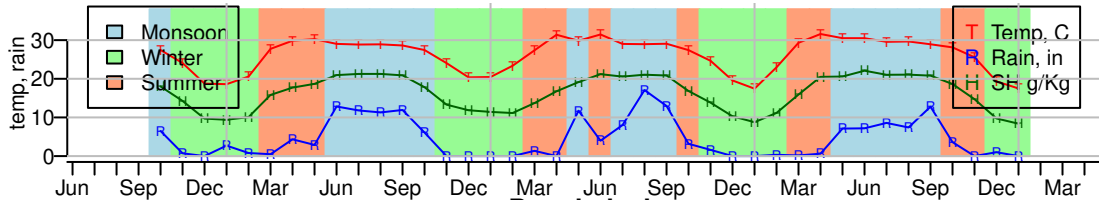

# Bangladesh

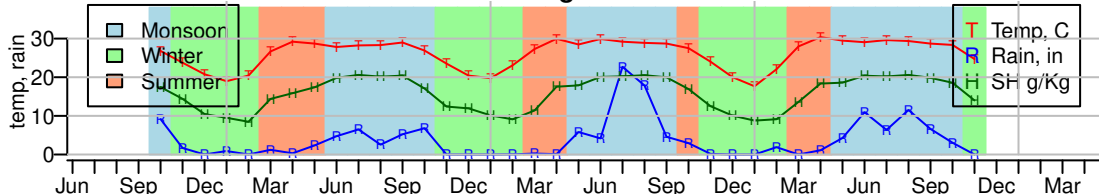

Supplement: pntd.0007211.s006.pdf [file pntd.0007211.s006.pdf]
